# Supplementary material for: Non-amphiphilic pyrene cored poly(aryl ether) dendron based gels: tunable morphology, unusual solvent effects on the emission and fluoride ion detection by the self-assembled superstructures
Source: Royal Society of Chemistry journal article supplement (doi:10.1039/c2sm26151k), 2012-01-01
Supplement: c2sm26151k.pdf [file c2sm26151k.pdf]

## Supporting Information

# ***Non-amphiphilic* pyrene cored poly(aryl ether) dendron based gels: tunable morphology, unusual solvent effects on the emission and fluoride ion detection by the self-assembled superstructures**

**P. Rajamalli and Edamana Prasad\***

*Department of Chemistry, Indian Institute of Technology Madras (IITM), Chennai 600 036,  
India*

Email: [pre@iitm.ac.in](mailto:pre@iitm.ac.in)

| <b>Contents</b>                                                        | <b>Page Number</b> |
|------------------------------------------------------------------------|--------------------|
| 1. Synthetic procedure and characterizations of dendrons               | 02                 |
| 1.1. Synthetic procedure for compound <b>II</b>                        | 02                 |
| 1.2. Synthetic procedure for compound <b>III</b>                       | 03                 |
| 1.3. Synthetic procedure for compound <b>IV</b>                        | 03                 |
| 2. Plots of solvent parameters vs CGC value                            | 04                 |
| 3. FT-IR spectrum of gel                                               | 05                 |
| 4. Powder X-ray diffraction patterns of compound <b>I</b> to <b>IV</b> | 06                 |
| 5. Plot of phase transition temperature vs concentration               | 05                 |
| 6. SEM images of xerogel and spherical aggregates                      | 07                 |
| 7. Dynamic light scattering data                                       | 08                 |
| 8. AFM images of xerogel and spherical aggregates                      | 08                 |
| 9. AFM images of spiral and helical structure                          | 09                 |
| 10. CD spectrum                                                        | 09                 |
| 11. TEM images of vesicles and gels                                    | 10                 |
| 12. Steady state fluorescence spectra                                  | 12                 |

|                                                                                                    |    |
|----------------------------------------------------------------------------------------------------|----|
| 13. Fluorescence decay trace                                                                       | 12 |
| 14. UV-vis absorption spectra of <b>I</b> , <b>II</b> and <b>III</b> in presence of various anions | 13 |
| 15. <sup>1</sup> H NMR spectra in the presence of and absence of fluoride ion                      | 13 |
| 16. Reference                                                                                      | 14 |

## 1. Synthetic procedure and characterizations of dendrons

All compounds were synthesized according to reported procedures.<sup>1,2</sup>

### 1.1. Synthesis of compound **II**

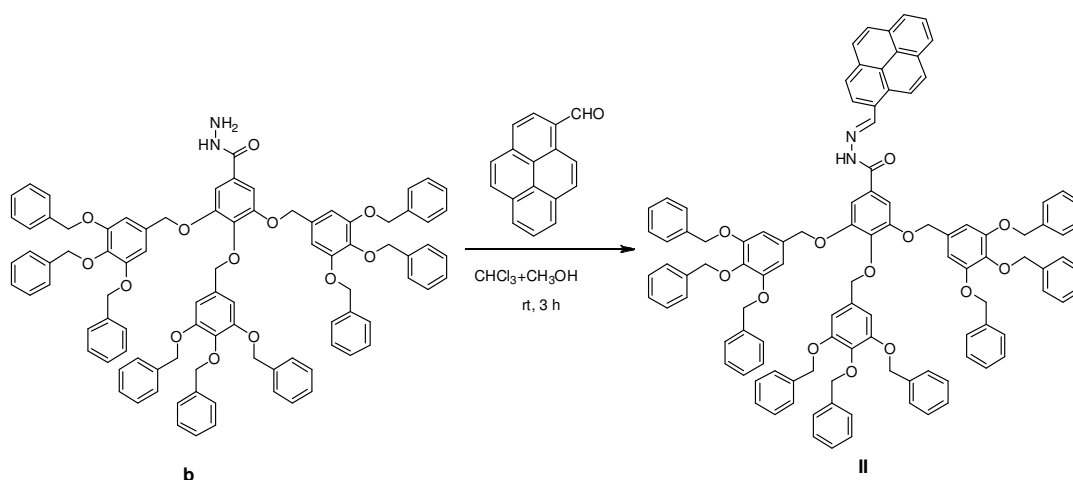

A solution of 1-pyrenecarboxaldehyde (0.16 g, 0.00071 mole) in methanol was added drop wise to a  $\text{CHCl}_3$  solution of compound **b** (1 g, 0.00071 mole). The mixture was stirred for 3 hours. The resulting precipitate was filtered off by suction and dried under vacuum to yield **II** (1.05 g, 90.5 %); <sup>1</sup>H NMR (400 MHz,  $\text{CDCl}_3$ )  $\delta$ : 4.84-5.05 (m,  $\text{ArCH}_2\text{O}$ , 24H), 6.74-6.79 (m,  $\text{ArH}$ , 6H), 7.21-7.36 (m,  $\text{ArH}$  &  $\text{PhH}$ , 47H), 7.99 (s,  $\text{PyH}$ , 3H), 8.09-8.14 (m,  $\text{PyH}$ , 3H), 8.12-8.19 (d,  $J = 8$  Hz,  $\text{PyH}$ , 1H), 8.71 (s,  $\text{PyH}$ , 2H), 9.05 (s,  $\text{CH}=\text{N}$ , 1H), 9.15 (s,  $\text{CONH}$ , 1H); <sup>13</sup>C NMR (100 MHz,  $\text{DMSO-d}_6$ )  $\delta$ : 70.61, 70.82, 71.16, 74.88, 74.98, 106.98, 107.57, 107.61, 108.74, 127.15, 127.55, 127.74, 128.13, 128.31, 128.46, 128.63, 128.88, 128.95, 128.98, 130.24, 130.78, 131.12, 131.30, 131.77, 131.89, 133.84, 133.98, 134.80, 134.93, 137.25, 137.41, 148.36, 151.90, 152.54, 168.29; MS (MALDI-TOF):  $m/z$  Calcd for  $\text{C}_{108}\text{H}_{88}\text{N}_2\text{O}_{13}$ : 1620.62, found: 1660.14 [ $\text{M}+\text{K}$ ]<sup>+</sup>.

## 1.2 Synthesis of compound III

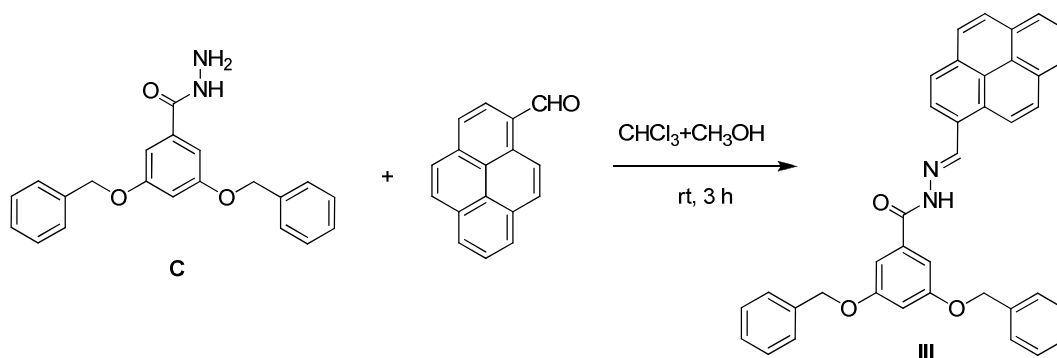

A solution of 1-pyrene-carboxaldehyde (0.66 g, 0.0029 mole) in methanol was added drop wise to a  $\text{CHCl}_3$  solution of compound **c** (1 g, 0.0029 mole) under nitrogen atmosphere. The mixture was stirred for 3 hours. The resulting precipitate was filtered off by suction and dried under vacuum to yield **III** (1.56 g, 93.9 %);  $^1\text{H NMR}$  (400 MHz,  $\text{DMSO-d}_6$ )  $\delta$ : 5.19 (s,  $\text{ArCH}_2\text{O}$ , 4H), 6.95 (s,  $\text{ArH}$ , 1H), 7.26-7.49 (m,  $\text{ArH}$  &  $\text{PhH}$ , 12H), 8.11 (t,  $\text{PyH}$ ,  $J = 7.6$  Hz, 1H), 8.24 (m,  $\text{PyH}$ , 2H), 8.35 (t,  $\text{PyH}$ ,  $J = 8.0$  Hz, 4H), 8.57 (d,  $\text{PyH}$ ,  $J = 8.0$  Hz, 1H), 8.79 (d,  $\text{PyH}$ ,  $J = 9.2$  Hz, 1H), 9.51 (s,  $\text{CH}=\text{N}$ , 1H), 11.95 (s,  $\text{CONH}$ , 1H);  $^{13}\text{C NMR}$  (100 MHz,  $\text{DMSO-d}_6$ )  $\delta$ : 69.99, 103.29, 107.72, 124.24, 124.86, 125.08, 125.21, 125.56, 125.73, 126.90, 128.17, 128.31, 128.41, 128.07, 131.13, 131.75, 138.09, 144.58, 159.58, 168.4; **HRMS (ES+)**:  $m/z$  Calcd for  $\text{C}_{38}\text{H}_{28}\text{N}_2\text{O}_3$ : 560.2100, found: 561.2189 $[\text{M}+\text{H}]^+$ .

## 1.3 Synthesis of compound IV

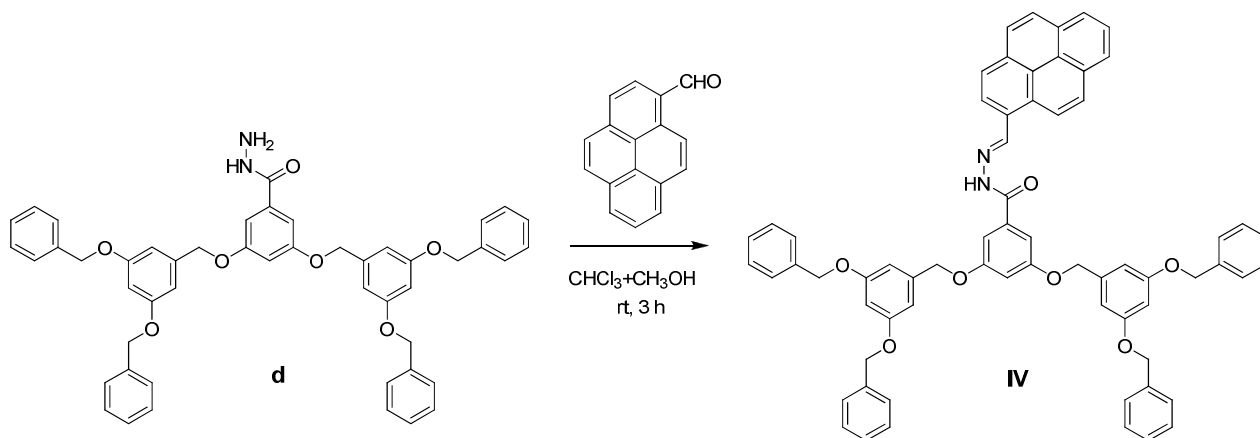

A solution of 1-pyrene-carboxaldehyde (0.298 g, 0.0013 mole) in methanol was added drop wise to a  $\text{CHCl}_3$  solution of compound **d** (1 g, 0.0013 mole). The mixture was stirred for 3 hours. The

resulting precipitate was filtered off by suction and dried under vacuum to yield **IV** (1.2 g, 92.4 %);  $^1\text{H NMR}$  (400 MHz,  $\text{DMSO-d}_6$ )  $\delta$ : 5.06 (s,  $\text{ArCH}_2\text{O}$ , 8H), 5.11 (s,  $\text{ArCH}_2\text{O}$ , 4H), 6.63 (s,  $\text{ArH}$ , 2H), 6.73 (s,  $\text{ArH}$ , 4H), 6.92 (s,  $\text{ArH}$ , 1H), 7.23-7.42 (m,  $\text{ArH}$  &  $\text{PhH}$ , 22H), 8.19 (t,  $\text{PyH}$ ,  $J = 6.0$  Hz, 1H), 8.22 (m,  $\text{PyH}$ , 2H), 8.34 (t,  $\text{PyH}$ ,  $J = 6.0$  Hz, 4H), 8.57 (d,  $\text{PyH}$ ,  $J = 8.0$  Hz, 2H), 8.78 (d,  $\text{PyH}$ ,  $J = 6.0$  Hz, 2H), 9.50 (s,  $\text{CH=N}$ , 1H) 11.98 (s,  $\text{CONH}$ , 1H).  $^{13}\text{C NMR}$  (100 MHz,  $\text{DMSO-d}_6$ )  $\delta$ : 70.28, 101.80, 106.56, 125.51, 126.20, 127.30, 127.70, 127.77, 127.96, 128.17, 128.37, 128.58, 128.73, 128.74, 129.09, 130.49, 131.39, 136.86, 139.00, 160.29, 160.35, 168.  $\text{MS}$  (MALDI-TOF):  $m/z$  Calcd for  $\text{C}_{66}\text{H}_{52}\text{N}_2\text{O}_7$ : 984.37, found: 1008.2 $[\text{M}+\text{Na}]^+$ , 1024.4 $[\text{M}+\text{K}]^+$ .

## 2. Plots of solvent parameters Vs CGC value

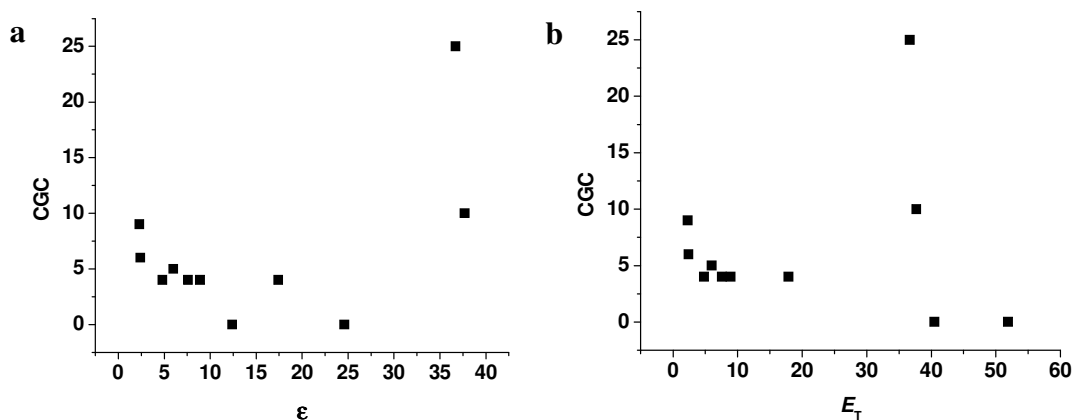

**Fig. S1** Effect of solvent polarity parameters a) Dielectric constant ( $\epsilon$ ), and b) Reichart's parameter ( $E_T$ ) on the CGC value for the compound **IV**.

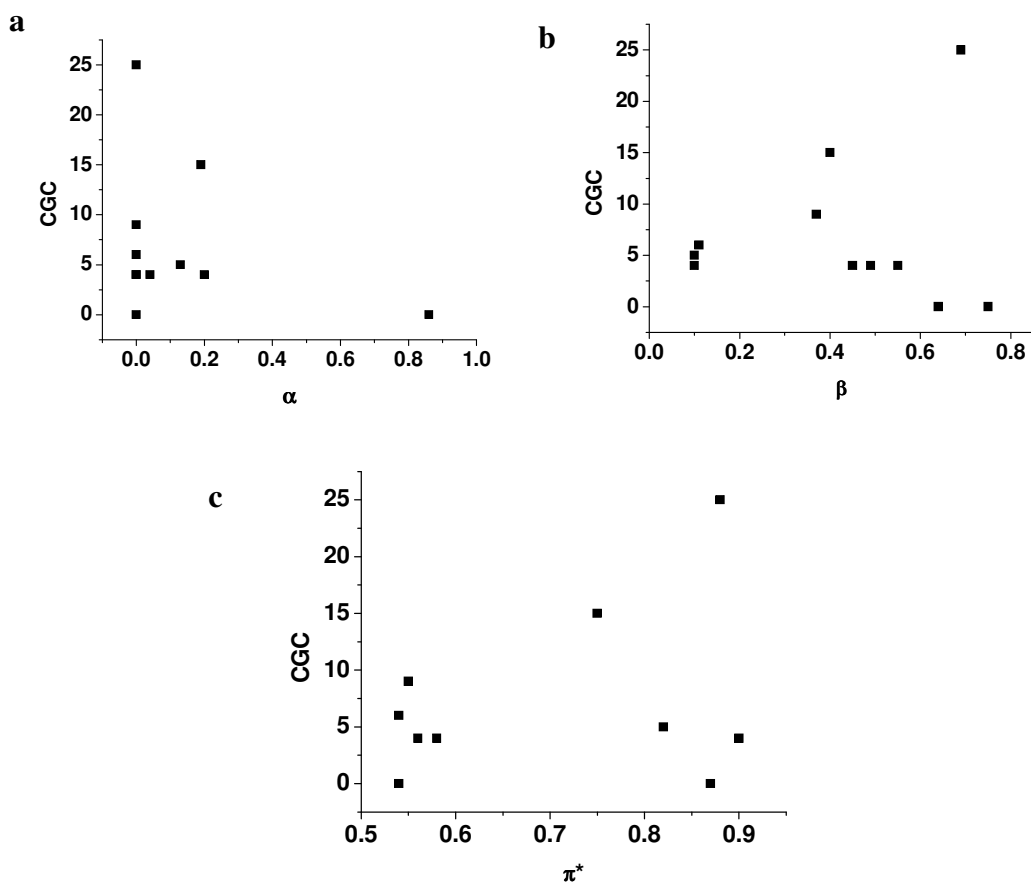

**Fig. S2** Effect of individual Kamlet–Taft parameter on the CGC value for the compound **IV**  
CGC values a)  $\alpha$  vs CGC, b)  $\beta$  vs CGC, and c)  $\pi^*$  vs CGC.

### 3. FT-IR spectrum of gel

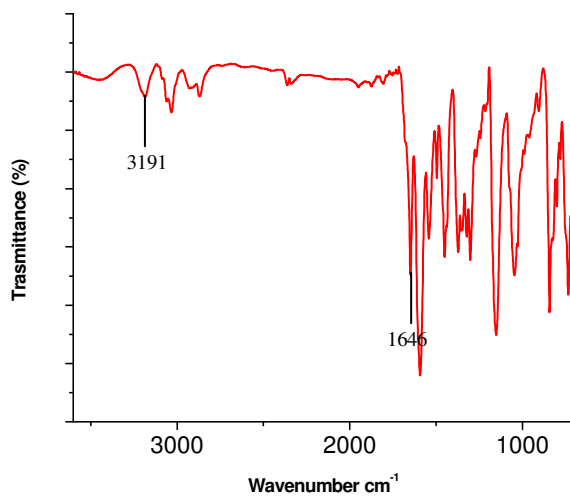

**Fig. S3** FT-IR spectrum of the xerogel formed from compound **IV** in  $\text{CHCl}_3$ .

#### 4. Powder-XRD Patterns

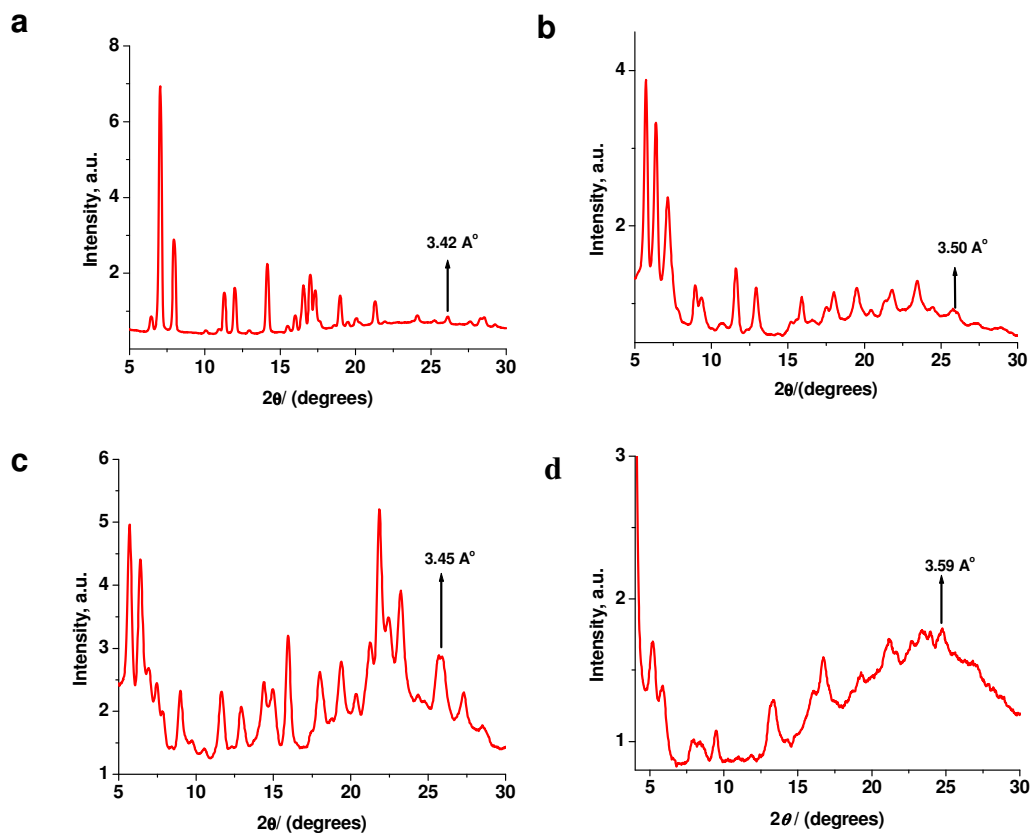

**Fig. S4** Powder XRD pattern of xerogel formed from a) compound **I**, b) compound **II**, c) compound **III**, and d) compound **IV** in  $\text{CHCl}_3$ .

#### 5. Plot of phase transition temperature vs concentration

The gel-sol phase transition temperature ( $T_{\text{gel}}$ ) was estimated to be in between  $53\text{-}63 \text{ }^\circ\text{C}$  in THF–water mixture (0.2–1.2 wt%). The gel transition temperature increases as the concentration of the gel increases. Plot shows the linear relation between the gel transition temperature and the gel concentration for the first generation  $\text{AB}_2$  type dendron derivatives in THF–water mixture (1:1)

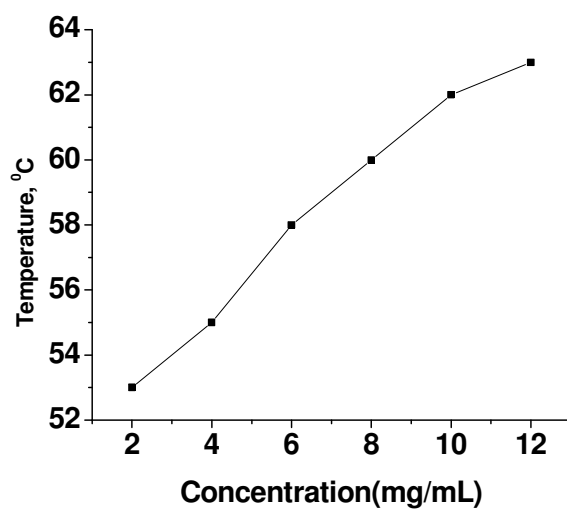

**Fig. S5** Effect of concentration on the gel-sol phase-transition temperature ( $T_{gel}$ ) of compound **III** in THF: water mixture, measured by ball dropping method.

## 6. SEM images of xerogel and spherical aggregate

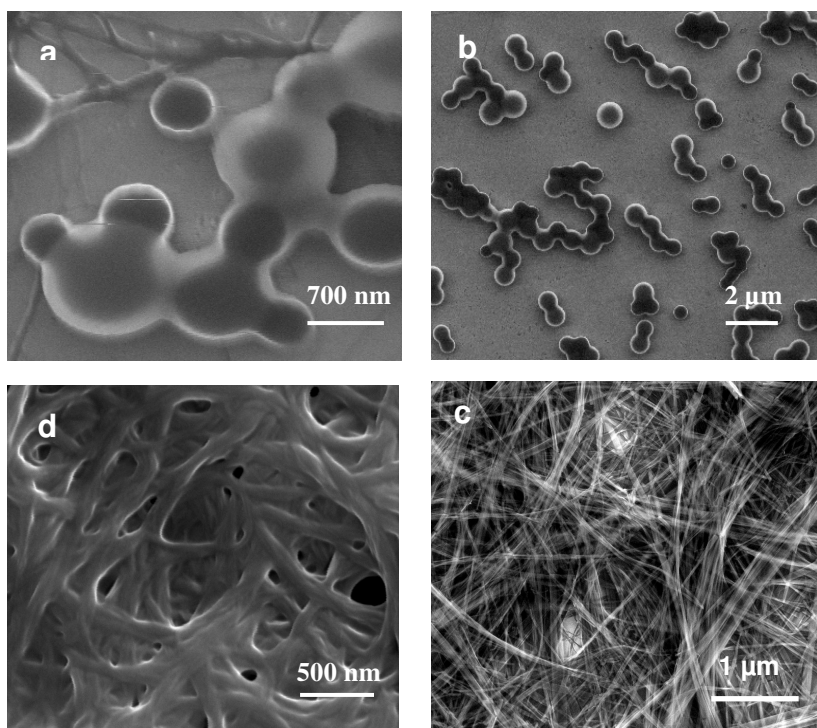

**Fig. S6** SEM images of compound **IV**; a) larger vesicle formation from smaller vesicles in  $\text{CHCl}_3$ -MeOH, b) fibre formation from vesicles, c) finer formation in  $\text{CHCl}_3$ -hexane (above CGC), and d) fibre formation from compound **I** in THF-water.

## 7. Dynamic light scattering data

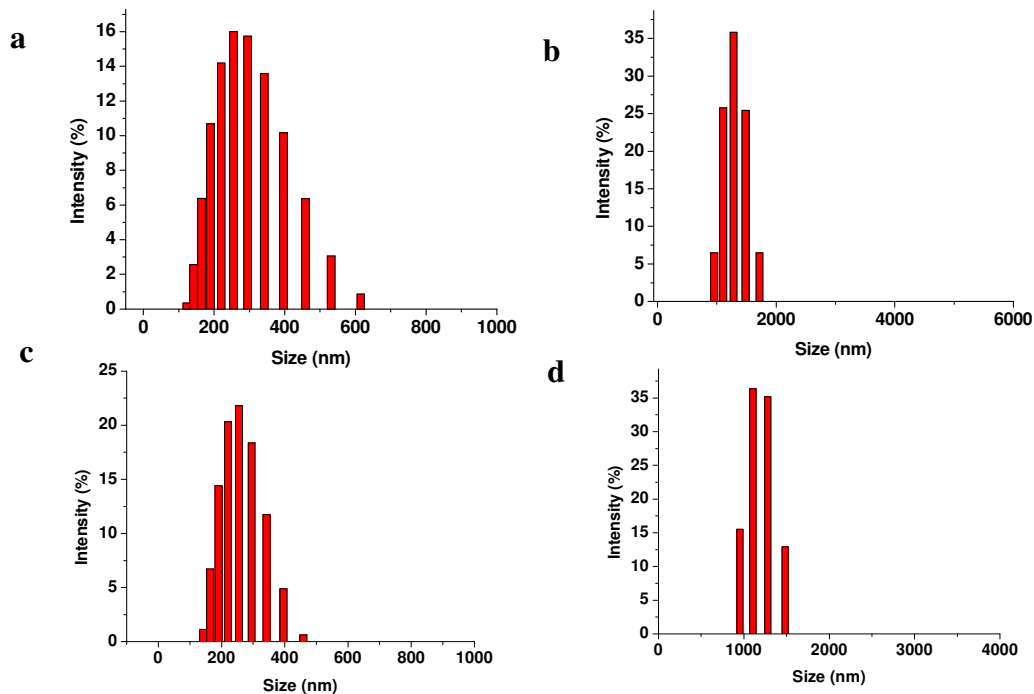

**Fig. S7** Dynamic light scattering histograms of compounds II and IV in CHCl<sub>3</sub>-MeOH (1:1; v/v): [II] = [IV] = 1 × 10<sup>-5</sup> M for (a) and (c), and [II] = [IV] = 1 × 10<sup>-4</sup> M for (b) and (d).

## 7. AFM images of xerogel and spherical aggregates

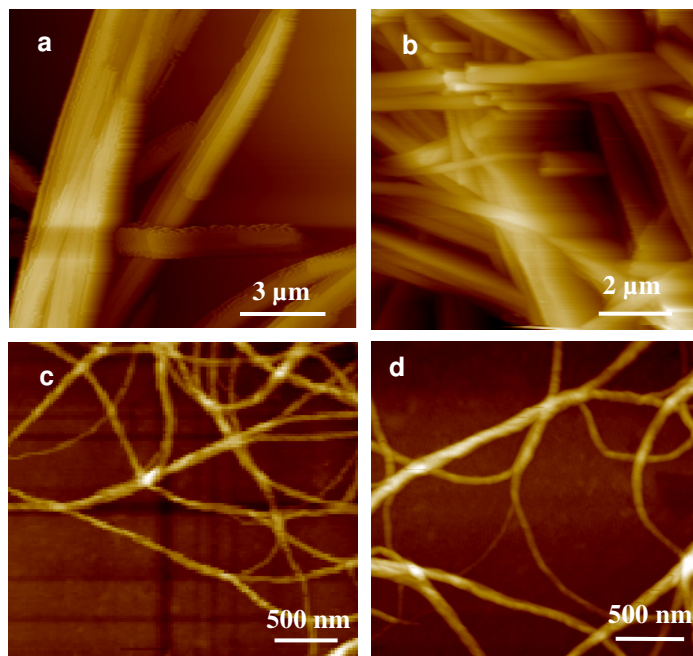

**Fig. S8** AFM images of xerogel formed from a) compound I, b) compound III, c) compound II and d) compound IV in CHCl<sub>3</sub>.



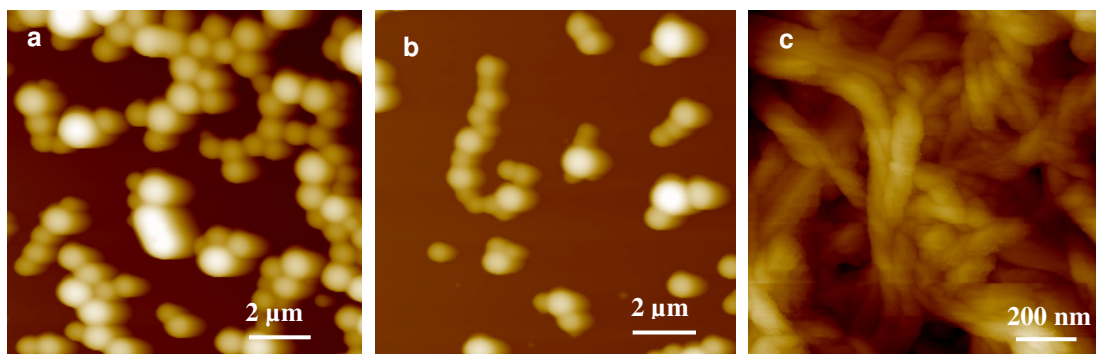

**Fig. S9** AFM images of a) compound **II** in CHCl<sub>3</sub>-MeOH (below CGC), b) vesicle to fibre conversion for compound **II**, and c) xerogel formed from compound **IV** in CHCl<sub>3</sub>-hexane (above CGC).

### 8. AFM images of spiral and helical structure

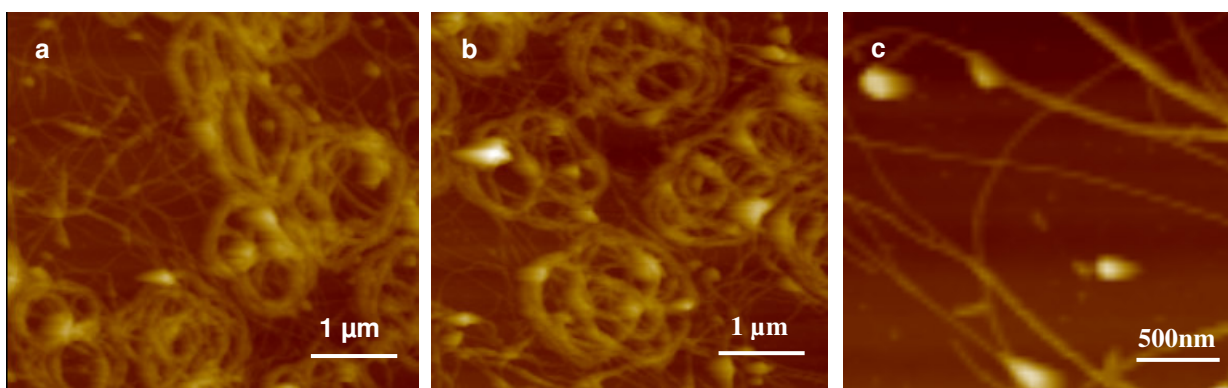

**Fig. S10** AFM images of gel formed from toluene: a) compound **I**, b) compound **III**, and c) compound **II**.

### 9. CD spectrum

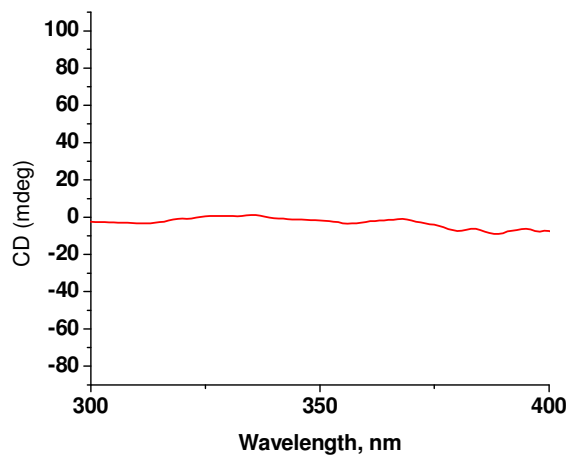

**Fig. S11** CD spectrum of compound **I** in toluene.

## 10. TEM images of vesicles and gels

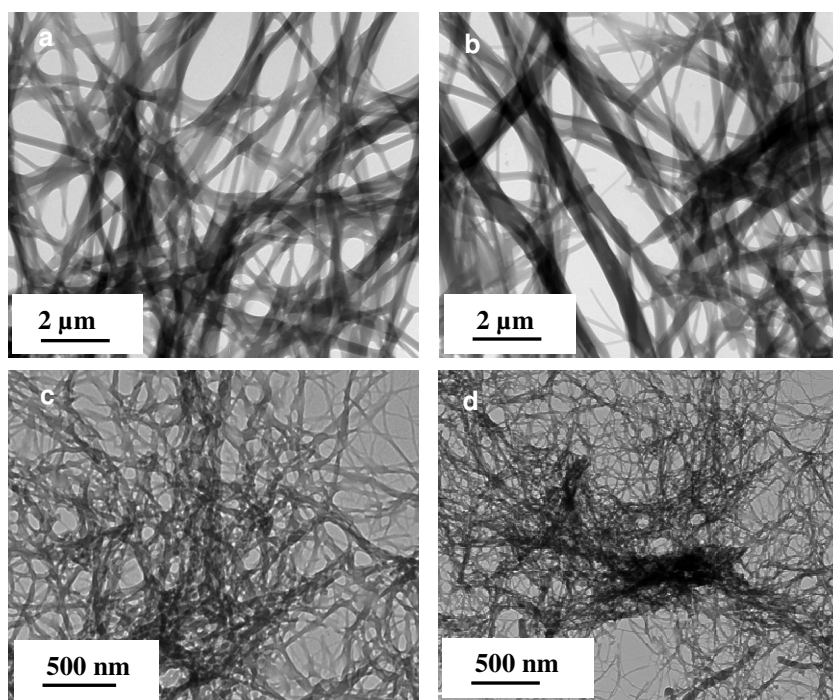

**Fig. S12** TEM images of xerogel formed from a) compound **I**, b) compound **III**, c) compound **II** and d) compound **IV** in  $\text{CHCl}_3$ .

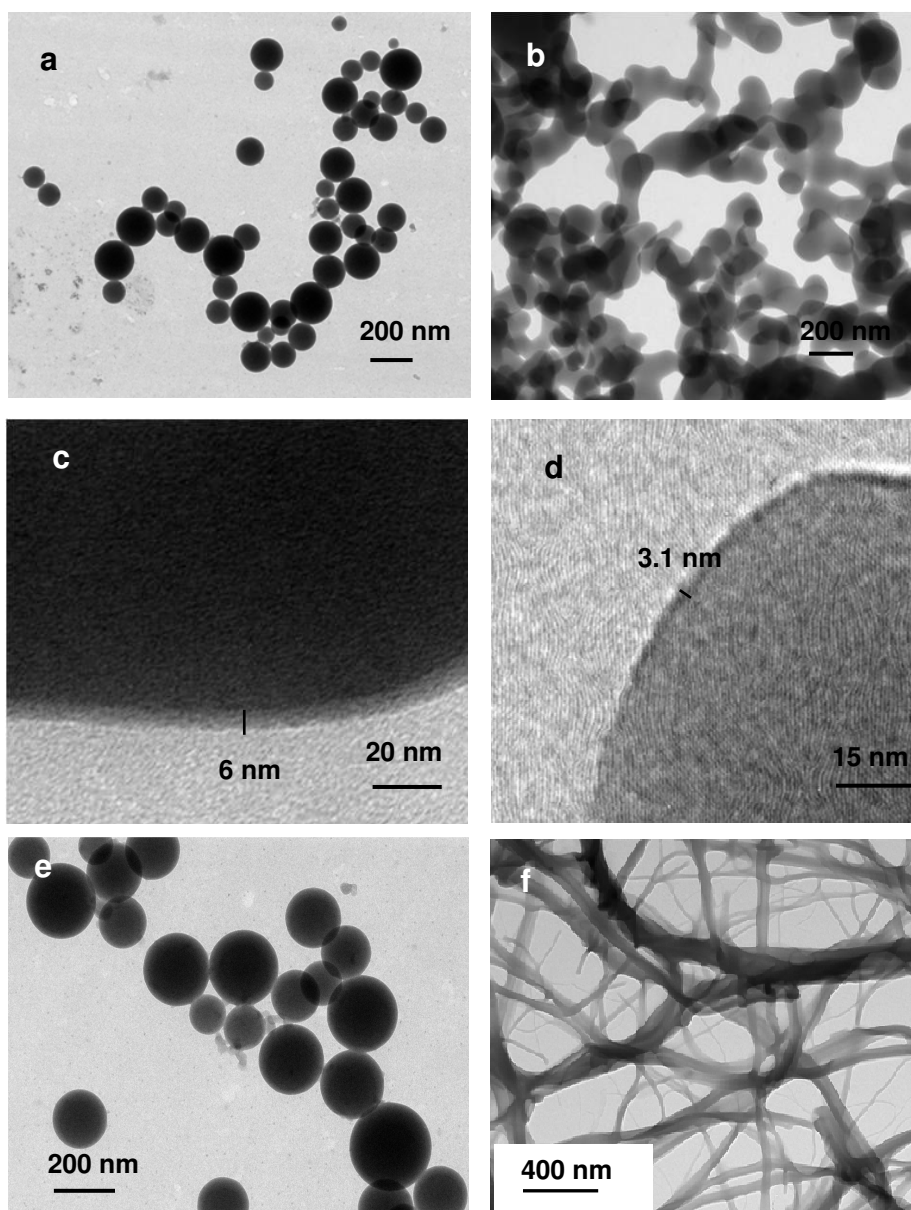

**Fig. S13** TEM images of a) compound **IV** in CHCl<sub>3</sub>-hexane (1x10<sup>-5</sup> M), b) compound **IV** in CHCl<sub>3</sub>-hexane (1x10<sup>-4</sup>), c) compound **IV** in CHCl<sub>3</sub>-hexane (1x10<sup>-5</sup>M) with higher magnification, d) compound **IV** in CHCl<sub>3</sub>-MeOH (1x10<sup>-5</sup>M) with higher magnification, e) compound **II** from CHCl<sub>3</sub>-MeOH (1x10<sup>-5</sup>M), and f) xerogel formed from compound **II** in CHCl<sub>3</sub>-MeOH.

## 11. Steady state fluorescence spectra

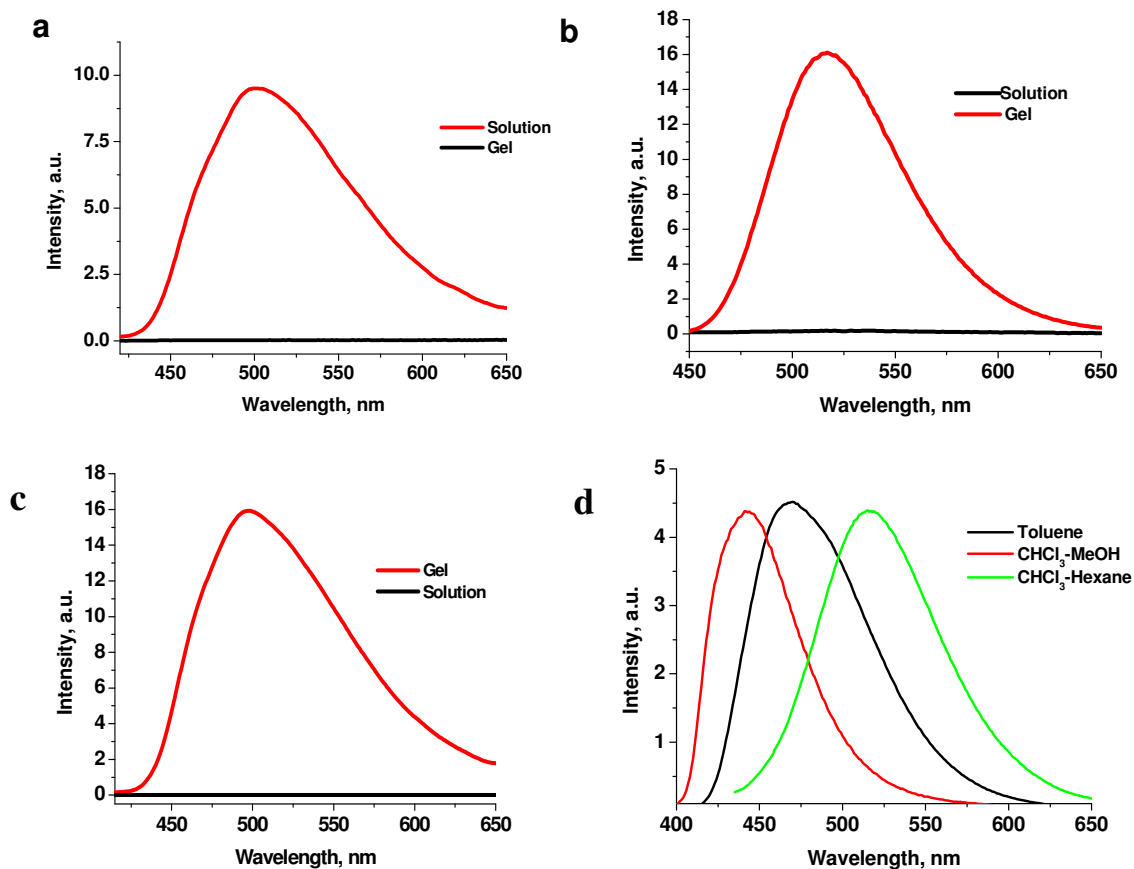

**Fig. S14** Emission spectra of compounds **I**, **II**, and **III** in the gel phase (formed from CHCl<sub>3</sub>) (red traces in a, b and c, respectively), and in CHCl<sub>3</sub> solution ( $1 \times 10^{-4}$  M) (black traces in a, b and c, respectively). (d) Emission spectra of compound **II** (gel) formed from toluene (black), CHCl<sub>3</sub>-MeOH (red) and CHCl<sub>3</sub>-Hexane mixtures.

## 12. Fluorescence decay trace

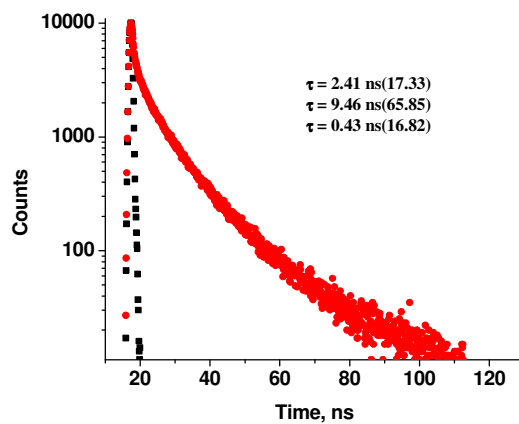

**Fig. S15** Fluorescence decay of gel formed from compound **IV** in CHCl<sub>3</sub>

### 13. UV-vis absorption spectra of compounds I, II and III in presence of various anions

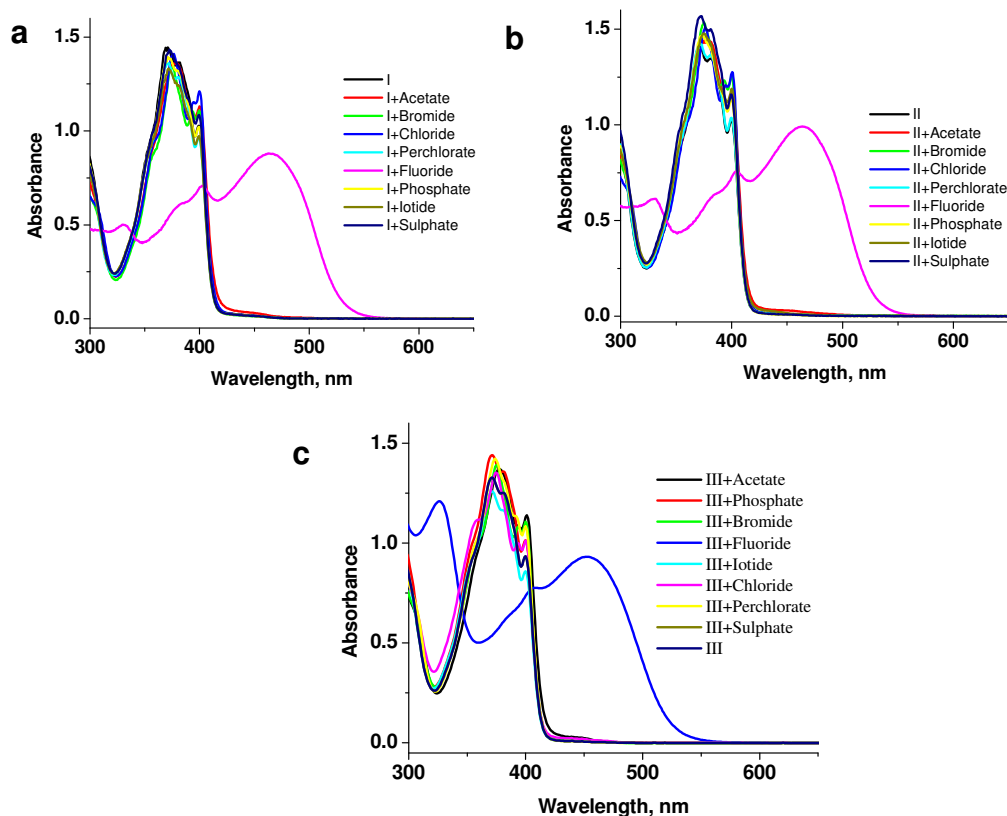

**Fig. S16** UV-vis absorption spectra of a) compound **I** ( $5 \times 10^{-5}$  M), b) compound **II** ( $5 \times 10^{-5}$  M), and c) compound **III** ( $5 \times 10^{-5}$  M) in the presence of 1 equiv of various anions in THF.

### 14. $^1\text{H}$ NMR spectra in the presence of and absence of fluoride ion

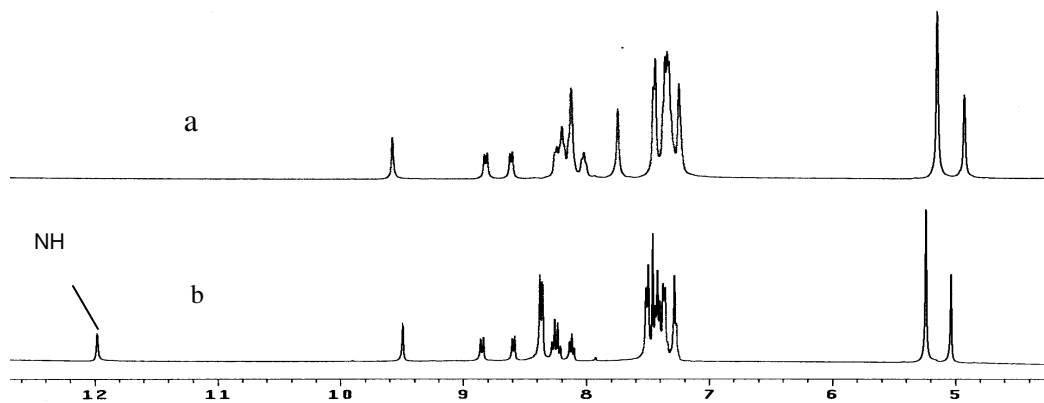

**Fig. S17**  $^1\text{H}$  NMR spectra of compound **I** in  $\text{DMSO-d}_6$ : (a) in the presence and (b) in the absence of 1 equiv. of  $\text{F}^-$  ion

## 16. Reference:

1. P. Rajamalli, E. Prasad, *New J. Chem.* 2011, **35**, 1541-1548.
2. P. Rajamalli, E. Prasad, *Org. Lett.* 2011, **13**, 3714-3717.
